# Supplementary material for: The function of oxybuprocaine: aparachuteeffect that sustains the supersaturated state of anhydrous piroxicam crystals
Source: Royal Society of Chemistry journal article supplement (doi:10.1039/c9ra09952b), 2020-01-01
Supplement: c9ra09952b1.pdf [file c9ra09952b1.pdf]

## Supplementary data

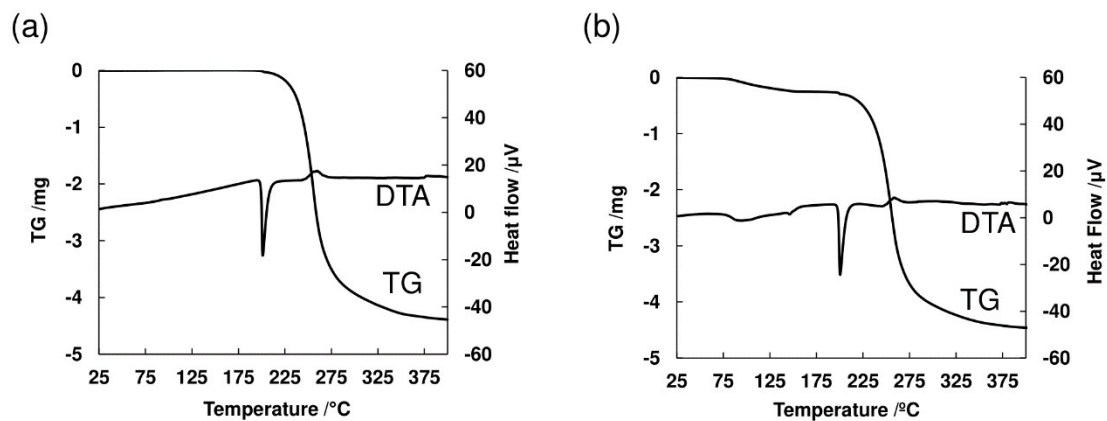

Fig.S1 The thermogravimetric (TG) analysis and differential thermal analysis (DTA) of PX-AH (a) and yellow solid precipitate (b). In (b), about 5.01% of mass loss was observed around 100 °C.

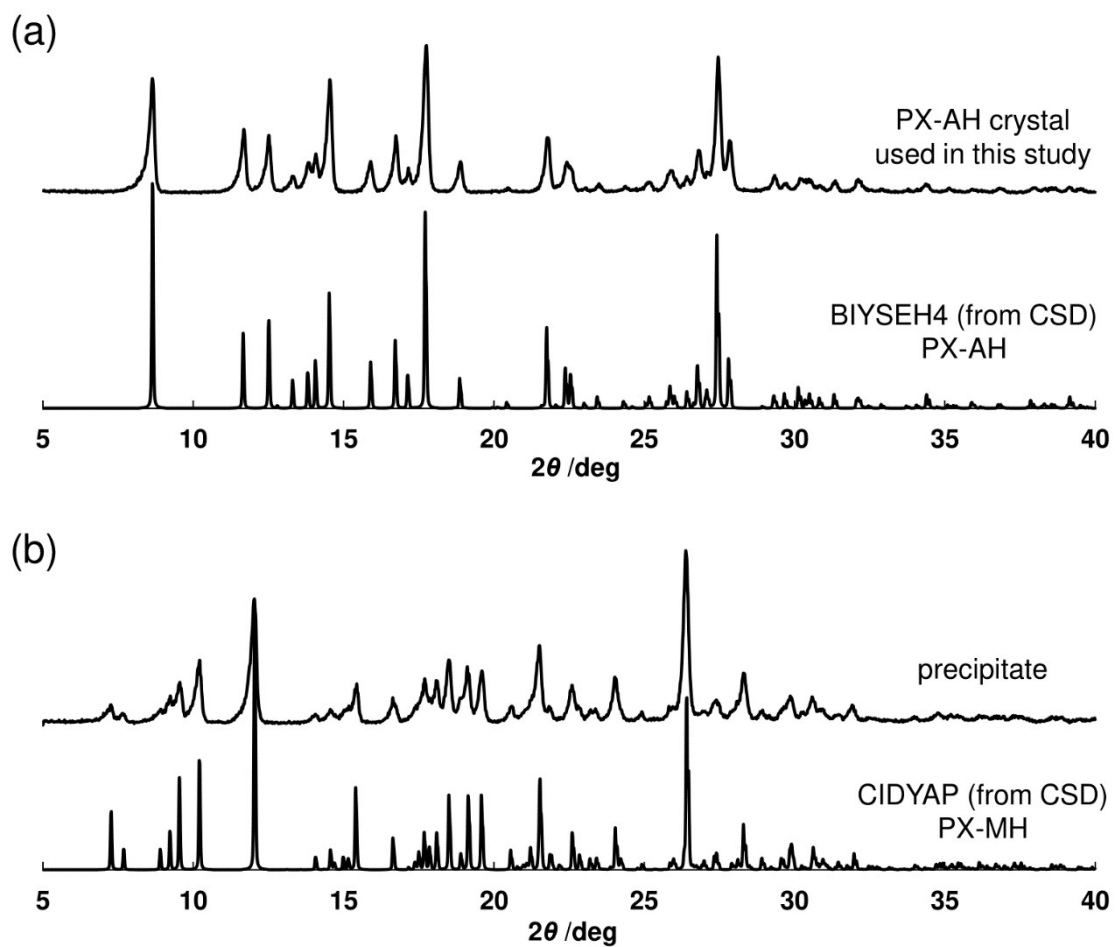

Fig. S2 The powder X-ray diffraction patterns of PX-AH (a) and yellow solid precipitate obtained from the dissolution study (b). The patterns of the PX-AH used in this study and the precipitate were compared to that of the PX-AH and PX-MH structure with a reference code of BIYSEH4 and CIDYAP indexed in the Cambridge Structural Database (CSD).

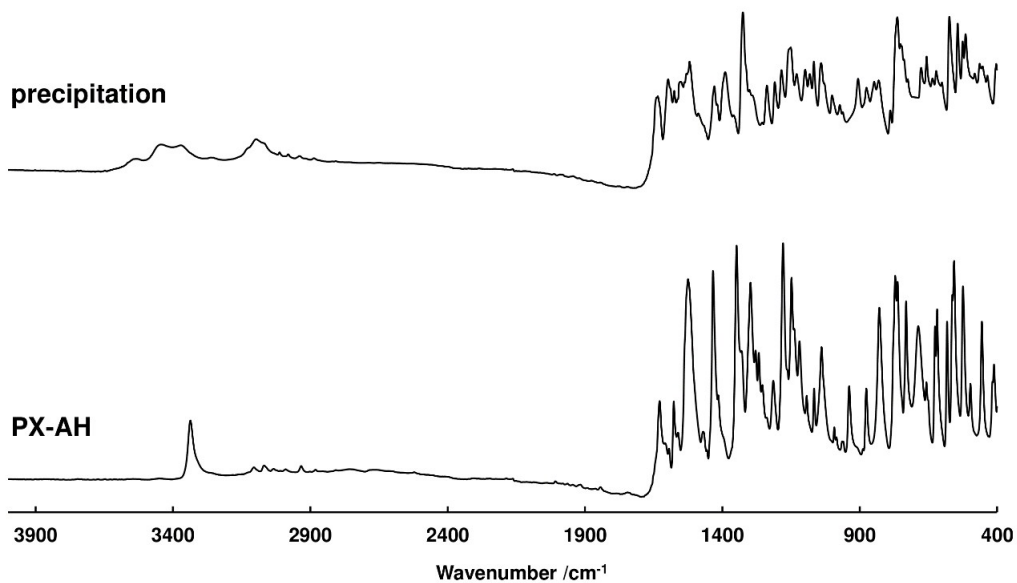

Fig.S3 The ATR-FTIR spectra of PX-AH (a) and yellow solid precipitate (b) obtained from the dissolution study of PX-AH in the absence of LAs.

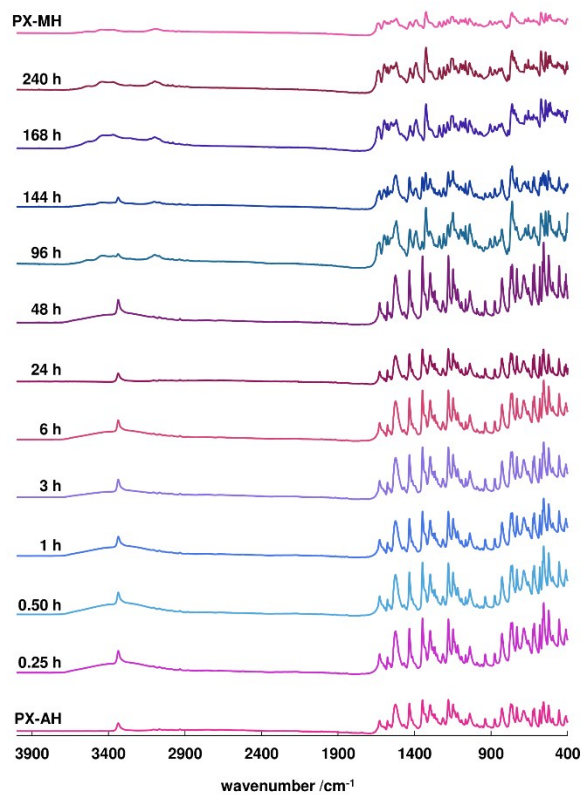

Fig.S4 The ATR-FTIR spectra of the solid phase of the samples when the dissolution study of PX-AH in 5 mM OXY solution was conducted in section 3.1.2.

Table S1. The values  $[PX]_{24h}$ ,  $\Delta[PX]_{24h}$ ,  $\gamma$ , and  $\Delta\gamma$  of for each LAs.

|          | $[PX]_{24h}$ | $\Delta[PX]_{24h}$ | $\gamma$ | $\Delta\gamma$ |
|----------|--------------|--------------------|----------|----------------|
| control  | 1.32         | 0.00               | 71.24    | 0.00           |
| 5 mM OXY | 0.73         | -0.59              | 46.86    | -24.38         |
| 5 mM TET | 0.71         | -0.60              | 46.05    | -25.19         |
| 5 mM LID | 1.33         | 0.02               | 62.88    | -8.36          |
| 5 mM DIB | 0.06         | -1.25              | 32.04    | -39.20         |

a:  $[PX]_{24 h}$  is the concentration of PX at 24h in buffer or 5 mM basic drug solutions

b:  $\Delta[PX]_{24 h} = [PX]_{5 \text{ mM basic drugs}}_{24 h} - [PX]_{\text{control}}_{24 h}$

c: Surface tension of 5 mM basic drug solutions. Control is the buffer solution without basic drugs.

d:  $\Delta\gamma = \gamma_{5 \text{ mM basic drug}} - \gamma_{\text{control}}$

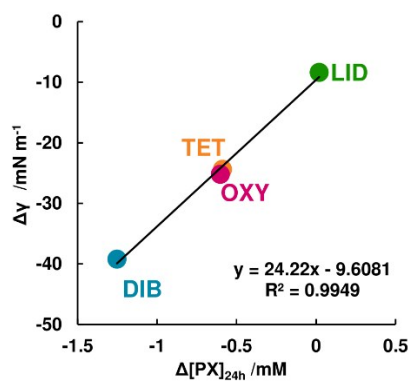

Fig. S5  $\Delta[\text{PX}]_{24\text{h}}$  and  $\Delta\gamma$  of LAs. For  $\Delta[\text{PX}]_{24\text{h}}$  and  $\Delta\gamma$ , the values in Table S1 of each LAs are used.

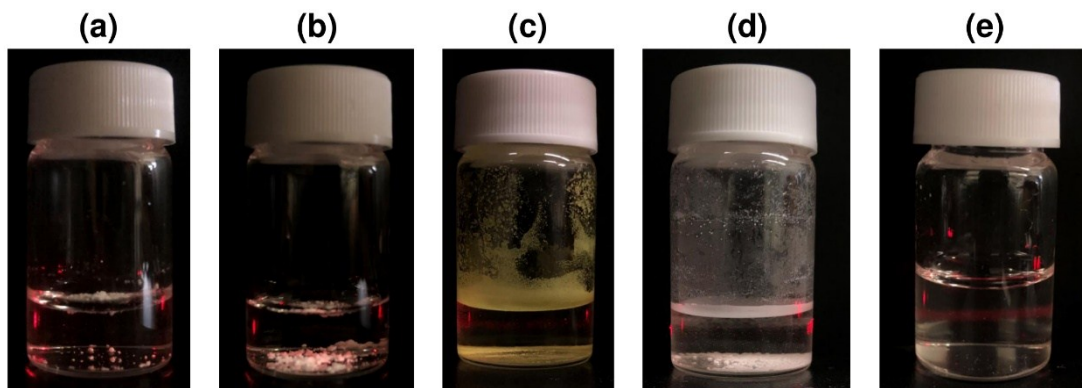

Fig. S6 The photos of the samples shined with light to observe the Tyndall effect. (a) PX-AH in buffer (before stirring), (b) PX-AH in 5 mM OXY solution (before stirring), (c) PX-AH in buffer (after stirring 6 h), (d) PX-AH in 5 mM OXY (after stirring 6 h) and (e) hydrogel of agarose (before stirring). The Tyndall effect only showed in (e).

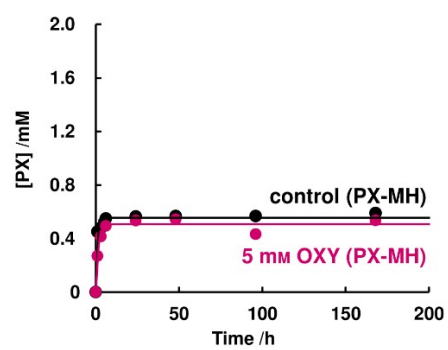

Fig. S7 The dissolution behavior of PX-MH in the absence and presence of OXY.



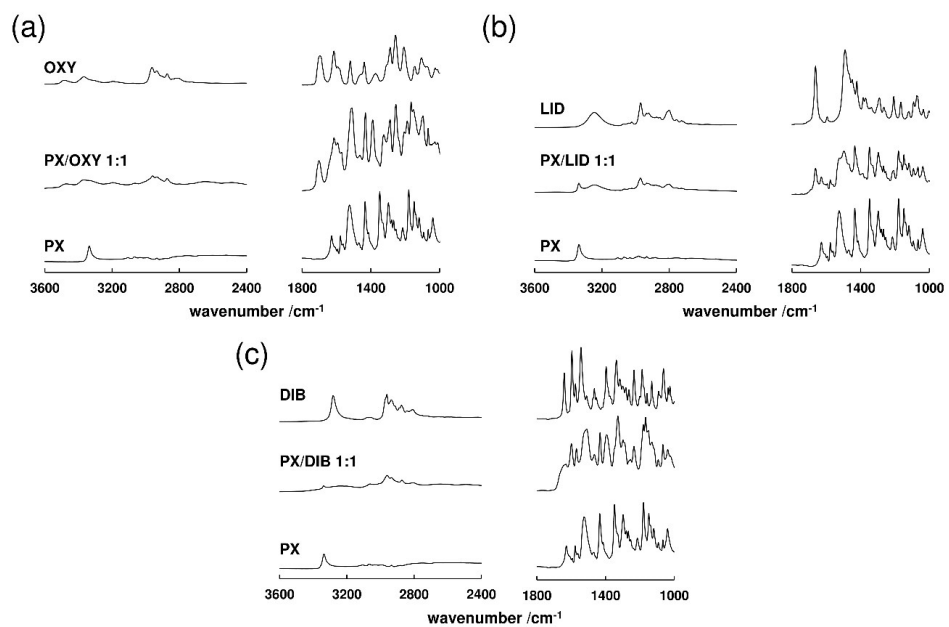

Fig. S8 The ATR-FTIR spectra of PX/OXY (a), PX/LID (b), and PX/DIB (c) mixtures in the molar ration of 1:1.

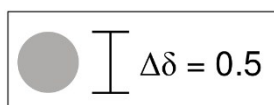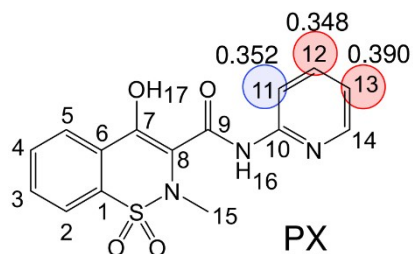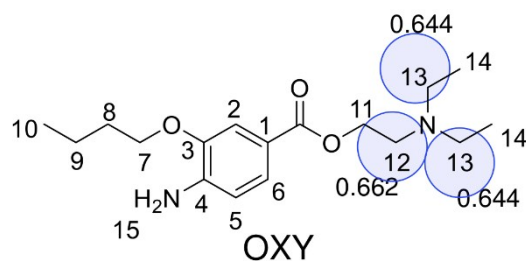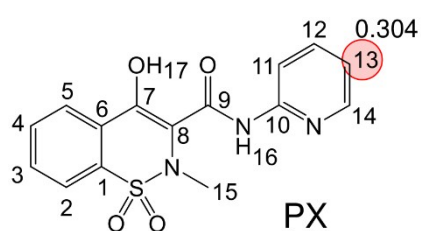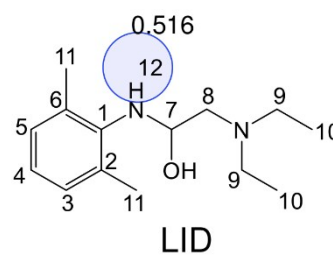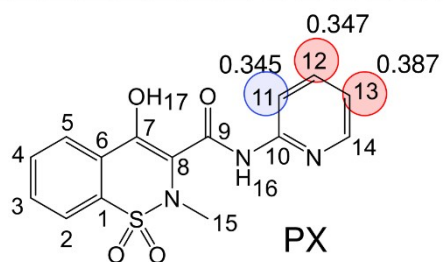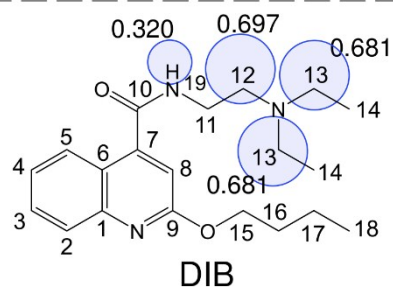

Fig. S9 The results of  $^1\text{H-NMR}$  analysis of PX/OXY, PX/LID, and PX/DIB mixtures in  $\text{DMSO-}d_6$ . The size of the circle shows how much the chemical shift shifted ( $\Delta\delta$ ) to lower (red) or higher (blue) magnetic field due to mixing PX and each LAs. The value written near each circle is the value of  $\Delta\delta$ .
